# Supplementary material for: Exploring behavioural factors influencing COVID-19-specific infection prevention and control measures in Finland: a mixed-methods study, December 2020 to March 2021
Source: PubMed Central journal article supplement (PMC9540522; doi:10.2807/1560-7917.es.2022.27.40.2100915), 2022-10-06
Supplement: 21-00915_LOHINIVA_SUPPLEMENT.pdf [file 21-00915_LOHINIVA_SUPPLEMENT.pdf]

## **Supplementary material**

This supplementary material is hosted by Eurosurveillance as supporting information alongside the article “ Exploring behavioral factors influencing COVID-19 specific infection prevention and control measures in Finland: a mixed methods study, December 2020 to March 2021”, on behalf of the authors, who remain responsible for the accuracy and appropriateness of the content. The same standards for ethics, copyright, attributions, and permissions as for the article apply. Supplements are not edited by Eurosurveillance and the journal is not responsible for the maintenance of any links or email addresses provided therein.

Supplementary file 1: Question guide for qualitative interviews including open-ended and semi-structured questions.

We would like to start this interview by learning about the difficulties that you faced in implementing pandemic-specific IPC measures during the pandemic when caring for patients and the reasons for those difficulties.

### **Knowledge**

Can you tell me about pandemic-related IPC recommendations or policies in your facility?

What do you know about them?

Are there any gaps in what you know about them?

Do you have difficulties obtaining information about them?

### **Social/ professional role**

What is your role in the following pandemic-related IPC measures? And the role of others?

To what extent is the following pandemic-specific IPC recommendation part of your professional role?

How is this influencing your performance at work?

### **Skills**

How easy or difficult would you find acting on pandemic-specific IPC recommendations?

Do you have the skills to follow these recommendations?

### **Beliefs about capabilities**

How confident are you that you can follow pandemic-specific IPC recommendations?

If confidence low: what would make you feel more confident?

How well equipped are you to follow the recommendations?

### **Beliefs about consequences**

What do you think will happen if you follow pandemic-related ICP recommendations?

What do you think are the benefits of doing this, for A. You? B. Patients? C. Pandemic

In your opinion, do the benefits of following these recommendations outweigh the costs?

What do you think happens if you do not follow pandemic-specific IPC measures?

### **Memory, attention, and decision processes**

Is following pandemic-specific IPC recommendations something you usually do?

How will you remember to do this in the future?

### **Environmental context and resources**

What environmental factors or resources help or hinder following pandemic-specific IPC recommendations?

Tell me about systems that are in place to support you if any.

### **Social influences**

Do your colleagues follow pandemic-specific IPC recommendations?

Do your colleagues support you to follow pandemic-specific IPC recommendations?

Does someone pressure you to follow pandemic-specific IPC recommendations?

### **Reinforcement**

How would you describe management's influence on pandemic-specific IPC practices?

Probes; Support, pressure, indifferent attitude, micromanagement etc.

### **Emotions**

How do your feelings at the time (mood, feelings towards the patient, fatigue) affect whether or not you can follow pandemic-related IPC recommendations?

## **Intentions**

What kind of situations or issues prompt you to improve your compliance with pandemic-specific measures?

## **Goal**

What do you think about pandemic-related IPC measures as a goal`?

Probes: What would motivate you to take IPC measures as a professional

## **Behavioral regulations**

Have you made any plans to improve your IPC compliance during the pandemic?

Are there things that help to prompt you to do it?

## **Optimism**

Do you feel optimistic about the implementation of pandemic-specific IPC measures? If yes why? If not, why?

Is there anything else you would like to share with us regarding the implementation of pandemic-related IPC measures?

Thank you for the interview!

Supplementary file 2: Codebook displaying the thematic analysis of the qualitative data to shed light on TDF domains; beliefs in capabilities, environmental context & resources, and reinforcement. The thematic analysis is conducted on three levels; codes, categories, and themes.

Nodes/ codebook

| Codes                                                                | Category                                        | Theme                      |
|----------------------------------------------------------------------|-------------------------------------------------|----------------------------|
| <b>TDF domain: Beliefs in capabilities:</b>                          |                                                 |                            |
| Too much information                                                 | Overflow of information                         | Sufficiency of information |
| Information is coming all the time (too much)                        | Overflow of information                         | Sufficiency of information |
| Information is changing all the time                                 | Overflow of information                         | Sufficiency of information |
| Information must not be concise (short)                              | Understandable information                      | Sufficiency of information |
| Information needs to include details                                 | Understandable information                      | Sufficiency of information |
| Guidelines need to cover all practices                               | Understandable information                      | Sufficiency of information |
| Information that is well structured                                  | Understandable information                      | Sufficiency of information |
| It matters how information is written                                | Understandable information                      | Sufficiency of information |
| Use of abbreviations and technical words makes instructions complex  | Understandable information                      | Sufficiency of information |
| Using illustrations facilitates reading of information               | Understandable information                      | Sufficiency of information |
| Information can be too generic to be used                            | Applicability of the information in the context | Sufficiency of information |
| Details refer to a specific setting, which makes it difficult to use | Applicability of the information in the context | Sufficiency of information |

| Codes                                                                                                                | Category                                        | Theme                      |
|----------------------------------------------------------------------------------------------------------------------|-------------------------------------------------|----------------------------|
| Health facilities are different, which make it difficult to be used                                                  | Applicability of the information in the context | Sufficiency of information |
| Guidance refers to handwashing. But our facility does not have many hand washing basis. We use alcohol rub much more | Applicability of the information in the context | Sufficiency of information |
| We have patients who walk around , the guidance we have received does not take that into account                     | Applicability of the information in the context | Sufficiency of information |
| We don't have staff areas at all. The guidance they provide us does not fit us.                                      | Applicability of the information in the context | Sufficiency of information |
| We cannot comply with the guidance at all. We have too many patients around                                          | Applicability of the information in the context | Sufficiency of information |
| Our facility is old. Information does not always consider it.                                                        | Applicability of the information in the context | Sufficiency of information |
| Information flow must be continuous                                                                                  | Availability of information                     | Sufficiency of information |
| Often an overflow of information in the beginning of epidemic                                                        | Availability of information                     | Sufficiency of information |
| Information comes late Friday afternoon when nobody is around to read it                                             | Availability of information                     | Sufficiency of information |
| If information is e mailed to staff members, not everyone has the time to read them                                  | Availability of information                     | Sufficiency of information |

| Codes                                                                                                             | Category                    | Theme                      |
|-------------------------------------------------------------------------------------------------------------------|-----------------------------|----------------------------|
| Instructions that are hanged on the wall are useful as everyone can see them and everyone has access to them      | Availability of information | Sufficiency of information |
| Educational sessions are not practical as nursing staff does not have the time                                    | Availability of information | Sufficiency of information |
| Provision of information during morning meetings reaches all                                                      | Availability of information | Sufficiency of information |
| Management must be well informed to be able to provide information to their staff members                         | Availability of information | Sufficiency of information |
| Management must be interested in IPC measures to transfer the information                                         | Availability of information | Sufficiency of information |
| When management has indifferent attitude, they don't make an effort to provide information to others              | Availability of information | Sufficiency of information |
| It is not possible to ask residents with memory loss to keep physical distance between them or the nursing staff. | Keeping social distance     | Nature of the IPC tasks    |
| Residents don't remember that they should keep physical distance                                                  | Keeping social distance     | Nature of the IPC tasks    |
| Residents are roaming around freely in the facility                                                               | Keeping social distance     | Nature of the IPC tasks    |
| Residents need assistance that requires close contact                                                             | Keeping social distance     | Nature of the IPC tasks    |

| Codes                                                                      | Category                          | Theme                   |
|----------------------------------------------------------------------------|-----------------------------------|-------------------------|
| between residents and nursing staff                                        |                                   |                         |
| Nursing is not possible without physical contact                           | Keeping social distance           | Nature of the IPC tasks |
| We don't have enough space to keep physical distancing                     | Keeping social distance           | Nature of the IPC tasks |
| It is not possible to keep physical distance between residents             | Keeping social distance           | Nature of the IPC tasks |
| Family members do not want to follow visiting rules                        | Communicating with family members | Nature of the IPC tasks |
| Family members do not care about visiting rules                            | Communicating with family members | Nature of the IPC tasks |
| I don't know how should I convince family members to follow visiting rules | Communicating with family members | Nature of the IPC tasks |
| I don't feel comfortable talking to family members about visit rules       | Communicating with family members | Nature of the IPC tasks |
| Family members do not listen to nursing staff                              | Communicating with family members | Nature of the IPC tasks |
| Negotiation skills are needed                                              | Communicating with family members | Nature of the IPC tasks |
| Communication with family members is difficult                             | Communicating with family members | Nature of the IPC tasks |
| Family members do not respect nursing staff                                | Communicating with family members | Nature of the IPC tasks |
| Family members are difficult to manage                                     | Communicating with family members | Nature of the IPC tasks |
| No changing rooms                                                          | Space                             | Infrastructural support |

| Codes                                                                                                   | Category            | Theme                          |
|---------------------------------------------------------------------------------------------------------|---------------------|--------------------------------|
| No staff rooms                                                                                          | Space               | Infrastructural support        |
| Small workspaces                                                                                        | Space               | Infrastructural support        |
| Residents are in the near proximity all the time                                                        | Location            | Infrastructural support        |
| Residents can show up at any moment                                                                     | Use of space        | Infrastructural support        |
| Few handwashing basins                                                                                  | Use of space        | Infrastructural support        |
| Masks create allergic reactions                                                                         | Products            | Infrastructural support        |
| No appropriate place for hand hygiene products                                                          | Products            | Infrastructural support        |
| Hand hygiene products cannot be placed in the facility as residents can mistakenly take them (use them) | Use of space        | Infrastructural support        |
| <b>TDF Domain: Environmental context and resources</b>                                                  |                     |                                |
| New duties including taking residents to dining room                                                    | Modified procedures | Changes in professional duties |
| Personalized services for residents to keep physical distancing                                         | Modified procedures | Changes in professional duties |
| Overseeing that physical distancing is complied                                                         | Supervision         | Changes in professional duties |
| Reminding and explaining about the importance of physical distancing                                    | Education           | Changes in professional duties |



| Codes                                                                                            | Category           | Theme                                  |
|--------------------------------------------------------------------------------------------------|--------------------|----------------------------------------|
| Using stairs during working day instead of elevators                                             | New procedure      | Changes in professional duties         |
| Organizing visiting appointments                                                                 | New procedure      | Changes in professional duties         |
| Overseeing visits of family members                                                              | New procedure      | Changes in professional duties         |
| Organizing visiting places                                                                       | New procedure      | Changes in professional duties         |
| Cleaning visiting places                                                                         | Modified procedure | Changes in professional duties         |
| Re-organizing visiting places                                                                    | Modified procedure | Changes in professional duties         |
| No emergency plans include modified staffing plans                                               | Not available      | Lack of staff planning for emergencies |
| Not enough staff for emergency staffing plans                                                    | Not possible       | Lack of staff planning for emergencies |
| Emergency staffing plans create problems                                                         | Not possible       | Lack of staff planning for emergencies |
| Dedicated nursing staff for corona patients results to lack of nursing staff for other residents | Negative impact    | Lack of staff planning for emergencies |
| No budget to develop specific emergency staffing plans                                           | Not possible       | Lack of staff planning for emergencies |

| Codes                                                                      | Category                 | Theme                                  |
|----------------------------------------------------------------------------|--------------------------|----------------------------------------|
| Not enough staff to modify any staffing related plans                      | Not possible             | Lack of staff planning for emergencies |
| No guidance how to develop staff management plans                          | Not available            | Lack of staff planning for emergencies |
| No instructions to develop staffing plans for emergency situation          | Not available            | Lack of staff planning for emergencies |
| <b>TDF Domain: Reinforcement</b>                                           |                          |                                        |
| Positive feedback is a sign of appreciation                                | Appreciated by the staff | Management culture                     |
| Positive comments motivate                                                 | Appreciated by the staff | Management culture                     |
| Positive guidance is good                                                  | Appreciated by the staff | Management culture                     |
| Positive discussion motivate                                               | Appreciated by the staff | Management culture                     |
| Managers intentions to involve staff in planning encourages to work better | Appreciated by the staff | Management culture                     |
| Opportunities to talk with supervisor is empowering                        | Appreciated by the staff | Management culture                     |
| Discussions with manager are not common                                    | Not applied              | Management culture                     |
| Feedback is not routinely given                                            | Not applied              | Management culture                     |
| Often feedback is negative                                                 | Not applied              | Management culture                     |

| Codes                                                                   | Category       | Theme              |
|-------------------------------------------------------------------------|----------------|--------------------|
| No opportunities to receive feedback                                    | Not applied    | Management culture |
| Management is not available in the facility                             | Not applied    | Physical presence  |
| Managers stay in their own workroom                                     | Not possible   | Physical presence  |
| Manager stay at home during pandemic                                    | Not possible   | Physical presence  |
| Mangers do not make routinely rounds                                    | Not applied    | Management culture |
| During pandemic managers interact with staff less than in normal times  | Not applied    | Physical presence  |
| Casual staff is not considered in feedback or comments                  | Not considered | Management culture |
| Casual staff is not considered as staff so little contact with managers | Not considered | Management culture |
| Casual staff receives little supervision                                | Not considered | Management culture |

Supplementary file 3

Ordinary logistic regression and penalised ridge logistic regression, theoretical domain framework and related survey questions associated with the compliance of infection prevention and control measures among healthcare workers in long-term care facilities, Finland, December 2020 (n=422).

| Predictor                                    |                                                                                                                                                                                                                                                                                                                         | Ordinary logistic regression |           |         | Penalised ridge logistic regression |           |         |
|----------------------------------------------|-------------------------------------------------------------------------------------------------------------------------------------------------------------------------------------------------------------------------------------------------------------------------------------------------------------------------|------------------------------|-----------|---------|-------------------------------------|-----------|---------|
| Domain                                       | Survey question                                                                                                                                                                                                                                                                                                         | OR                           | 95%CI     | p value | OR                                  | 90%CI     | p value |
| Environmental context and resources          | How sufficient do you evaluate staffing to be able to comply with COVID-19-specific IPC measures?                                                                                                                                                                                                                       | 0.55                         | 0.32-0.94 | 0.027   | 0.52                                | 0.33-0.82 | 0.018   |
| Reinforcement and beliefs about capabilities | How do you evaluate management influences your ability to comply with COVID-19-specific IPC measures?<br><br>How do you consider feedback from management influencing your compliance with COVID-19-specific IPC measures?<br><br>How much are you able to improve your compliance with COVID-19-specific ICP measures? |                              |           |         | 1.73                                | 1.00-2.99 | 0.10    |

COVID-19, coronavirus disease 19; IPC; infection prevention and control; OR, odds ratio; CI, confidence interval
